# Supplementary material
Source: HighWire-hosted journal article supplement (https://bmjopen.bmj.com/content/10/6/e034897)
Supplement: inline-supplementary-material-2 [file inline-supplementary-material-2.pdf]

Name of Researchers: Dr Sheraz R. Markar, Professor George B. Hanna, Professor Tim Underwood, Mr Ewen Griffiths, Mr Ravi Vohra, Mr James Gossage, Mr Stuart Mercer, Mr Bilal Alkhaffaf, Mr Arun Ariyathenam, Mr Shameen Jahoo, Mr John Findlay

## CASE REPORT FORM

### LASTING Symptoms after Oesophageal Resectional Surgery (LASORS)

Participant Identification Number for this trial: .....

Name of place of surgery: .....

Current age of patient: .....

Gender: Male

Female

Height at surgery (cm): .....

Weight at surgery (kg): .....

Current weight (kg): .....

Date of surgery: .....

#### Preoperative medical comorbidities:

- Ischaemic Heart Disease
- Congestive heart failure
- Cerebrovascular disease
- Peripheral Vascular disease
- Dementia
- Chronic obstructive pulmonary disease
- Peptic ulcer disease
- Mild liver disease
- Diabetes
- Renal disease

#### ASA Grade:

- I
- II
- III
- IV

- Anastomosis location:** Cervical
- Thoracic
- Surgical technique:** Transhiatal
- Ivor-Lewis (2-stage)
- McKeown (3-stage)
- Left thoracoabdominal
- Colonic interposition
- Other – please specify

**How was the anastomosis constructed?**

- Linear Stapler
- Circular Stapler (please state diameter if known)
- Hand sewn

- Alignment of anastomosis:** End to end
- End to side
- Side to side
- Other (please specify)

**Surgical access:**

- Total Minimally Invasive Oesophagectomy
- Hybrid Minimally Invasive Oesophagectomy (Open abdominal and thoracoscopy)
- Hybrid Minimally Invasive Oesophagectomy (Laparoscopy and open thoracotomy)
- Total Open Oesophagectomy

**Pyloric management:**

- No drainage procedure
- Pyloroplasty
- Pyloromyotomy
- Manual pyloric dilatation or stretch
- Botulinum injection
- Other (please specify)

Case Report Form: Version 1.0 Date 25.03.2019  
IRAS No: xxx

- Was a feeding jejunostomy inserted?** Yes
- No
- Neoadjuvant therapy:** Combination chemoradiotherapy
- Radiotherapy alone
- Chemotherapy alone
- None
- Chemotherapy or chemoradiotherapy regimen:**
- CROSS
- MAGIC
- FLOT
- Other
- Unknown

CROSS - Paclitaxel (50 mg/m<sup>2</sup>) and Carboplatin (Area-Under-Curve = 2) administered by i.v. infusion on days 1, 8, 15, 22, and 29. External beam radiation with a total dose of 41.4 Gy given in 23 fractions of 1.8 Gy, 5 fractions a week.

MAGIC - Three preoperative and three postoperative cycles of intravenous epirubicin (50 mg per square meter of body-surface area) and cisplatin (60 mg per square meter) on day 1, and a continuous intravenous infusion of fluorouracil (200 mg per square meter per day) for 21 days.

- Adjuvant therapy:** Combination chemoradiotherapy
- Radiotherapy alone
- Chemotherapy alone
- None
- Pathological T stage:** T0
- T1
- T2
- T3
- T4
- Pathological N stage 7<sup>th</sup> Edition:** N0
- N1
- N2+
- Pathological TNM stage 7<sup>th</sup> Edition:** Stage I
- Stage II
- Stage III
- Stage IV

- Tumour histological subtype:**
- Adenocarcinoma
  - SCC
  - Other

**Postoperative complications (use complications platform from Low DE et al. *Annals of Surgery* 262 (2):286-294 2015):**

- Pulmonary
- Cardiac
- Gastrointestinal
- Urologic
- Thromboembolic
- Neurologic/psychiatric
- Infection
- Wound/diaphragm
- Other

**Please specify pulmonary complication:**

- Pneumonia
- Pleural effusion requiring additional drainage procedure
- Pneumothorax requiring treatment
- Atelectasis mucous plugging requiring bronchoscopy
- Respiratory failure requiring reintubation
- Acute respiratory distress syndrome (Berlin definition)
- Acute aspiration
- Tracheobronchial injury
- Chest tube maintenance for air leak for >10 days postoperatively

**Please specify cardiac complication:**

- Cardiac arrest requiring CPR
- Myocardial infarction as defined by the World Health Organisation
- Dysrhythmia atrial requiring treatment
- Dysrhythmia ventricular requiring treatment
- Congestive heart failure requiring treatment
- Pericarditis requiring treatment

**Please specify gastrointestinal complication:**

- Oesophagoenteric leak from anastomosis, stapled line or localised conduit necrosis
- Conduit necrosis/failure
- Ileus defined as small bowel dysfunction preventing or delayed enteral feeding
- Small bowel obstruction
- Feeding J-tube complication

Case Report Form: Version 1.0 Date 25.03.2019  
IRAS No: xxx

- Pyloromyotomy/pyloroplasty complication
- Clostridium Difficile infection
- Gastrointestinal bleeding requiring intervention or transfusion
- Delayed conduit emptying requiring intervention or delayed discharge or requiring maintenance of nasogastric drainage >7 days postoperatively
- Pancreatitis
- Liver dysfunction

**Please specify urological complication:**

- Acute renal insufficiency (defined as doubling of baseline creatinine)
- Acute renal failure requiring dialysis
- Urinary tract infection
- Urinary retention requiring reinsertion of urinary catheter, delaying discharge or discharge with a urinary catheter

**Please specify thromboembolic complication:**

- Deep vein thrombosis
- Pulmonary embolus
- Stroke (CVA)
- Peripheral thrombophlebitis

**Please specify neurologic/psychiatric complication:**

- Recurrent nerve injury
- Other neurologic injury
- Acute delirium
- Delirium tremens

**Please specify infection complication:**

- Wound infection requiring opening of wound or antibiotics
- Central i.v. line infection requiring removal of antibiotics
- Intrathoracic/intra-abdominal abscess
- Generalised sepsis
- Other infections requiring antibiotics

**Please specify wound/diaphragm complication:**

- Thoracic wound dehiscence
- Acute abdominal wall dehiscence/hernia
- Acute diaphragmatic hernia

**Please specify other complication:**

Case Report Form: Version 1.0 Date 25.03.2019  
IRAS No: xxx

- Chyle leak
- Reoperation for reasons other than bleeding, anastomotic leak or conduit necrosis
- Multiple organ dysfunction syndrome

**Late symptoms requiring intervention (>90 days following surgery):**

- Stricture
- Delaying emptying (requiring dilatation)
- Other

**Maximum Clavien-Dindo Classification of postoperative complication (include 30-day complications or in-patient stay – whichever is the longest)**

- I
- II
- III
- IV
